# Supplementary material
Source: PubMed Central journal article supplement (PMC4240507)
Supplement: NIHMS637828-supplement-Supporting_Information.pdf [file NIHMS637828-supplement-Supporting_Information.pdf]

# Supporting Information

## Reduction of CO<sub>2</sub> by Nitrogenases\*\*

Johannes G. Rebelein, Yilin Hu,\* Markus W. Ribbe\*

## SUPPLEMENTARY FIGURES

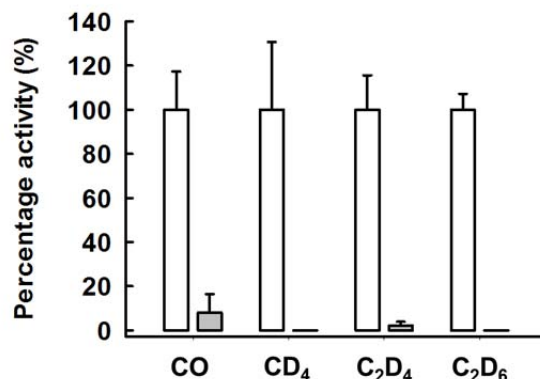

**Fig. S1. ATP-dependent product formation by V-nitrogenase from CO<sub>2</sub> reduction.**

Percentage activities of product formation by V-nitrogenase from CO<sub>2</sub> in the presence (white bars) or absence (grey bars) of ATP in D<sub>2</sub>O-based reactions. The percentage activities in the absence of ATP were calculated relative to those in the presence of ATP, with the latter set at 100%. The actual specific activities of product formation in the presence of ATP are, in nmol/μmol protein/h,  $194 \pm 17$  (CO),  $12.4 \pm 3.8$  (CD<sub>4</sub>),  $21.8 \pm 1.7$  (C<sub>2</sub>D<sub>4</sub>) and  $1.31 \pm 0.05$  (C<sub>2</sub>D<sub>6</sub>).

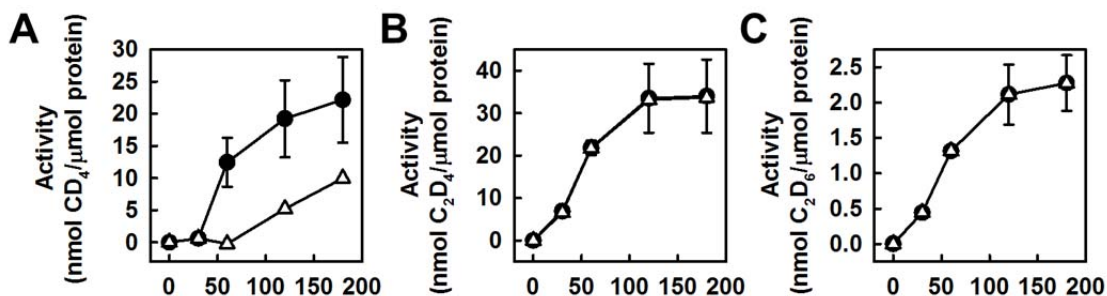

**Fig. S2. Contributions of CO<sub>2</sub> or CO<sub>2</sub>-derived intermediate(s) other than CO to product formation by V-nitrogenase.**

Data are taken from Fig. 4. Shown are the CO<sub>2</sub>-based time courses (●) and the difference curves between the CO<sub>2</sub>- and CO-based time courses (Δ) of CD<sub>4</sub> (A), C<sub>2</sub>D<sub>4</sub> (B) and C<sub>2</sub>D<sub>6</sub> (C), which suggests partial (A) or full (B and C) contribution of CO<sub>2</sub> or CO<sub>2</sub>-derived intermediate(s) other than CO to product formation by V-nitrogenase. The difference curve in A (Δ) was generated by ‘shifting’ the time course of CD<sub>4</sub> formation from CO (Fig. 4A, ⊙) 30 min to the right and subsequently subtracting it from the time course of CD<sub>4</sub> formation from CO<sub>2</sub> (Fig. 4A, ●).

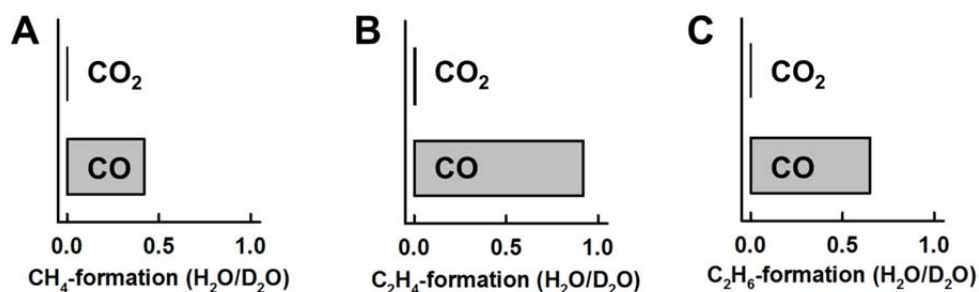

**Fig. S3. Formation of hydrocarbon products by V-nitrogenase.** Comparison between the CO<sub>2</sub>- and CO-based reactions with regard to the percentage activity of CH<sub>4</sub> (A), C<sub>2</sub>H<sub>4</sub> (B) and C<sub>2</sub>H<sub>6</sub> (C) formation in H<sub>2</sub>O relative to that in D<sub>2</sub>O. The bar labeled 'CO' was calculated by dividing the activity of product formation from CO in H<sub>2</sub>O by that in D<sub>2</sub>O; whereas the bar labeled 'CO<sub>2</sub>' was calculated by dividing the activity of product formation from CO<sub>2</sub> in H<sub>2</sub>O by that in D<sub>2</sub>O.

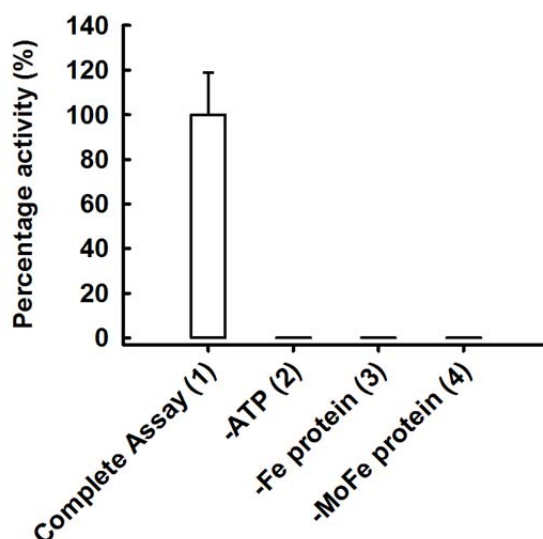

**Fig. S4. ATP- and component protein-dependent CH<sub>4</sub> formation by Mo-nitrogenase in the presence of CO<sub>2</sub>.** Percentage activities of CH<sub>4</sub> formation by Mo-nitrogenase in a complete assay containing ATP and both component proteins (1), in the absence of ATP (2), in the absence of Fe protein (3), and in the absence of MoFe protein (4) in H<sub>2</sub>O-based reactions. The percentage activity in the absence of ATP or either component protein of Mo-nitrogenase was calculated relative to that in the presence of ATP and dithionite, with the latter set at 100%. The actual specific activity of CH<sub>4</sub> formation in the presence of ATP and dithionite is  $3.7 \pm 0.7$  nmol/ $\mu$ mol protein/h.

## EXPERIMENTAL SECTION

Unless noted otherwise, all chemicals were purchased from Fisher Scientific (Pittsburgh, PA) and Sigma Aldrich (St. Louis, MO).  $^{12}\text{CO}$  (99.5% purity) was purchased from Praxair (Danbury, CT), and all isotope-labeled compounds ( $\geq 98\%$  isotopic purity) were purchased from Cambridge Isotope Labs (Tewksbury, MA).

**Protein Purification.** *Azotobacter vinelandii* strains expressing His-tagged MoFe and VFe proteins and non-tagged *vnfH*- and *nifH*-encoded Fe proteins (designated VnfH and NifH, respectively) were grown as described elsewhere.<sup>[1-4]</sup> Published methods were used for the purification of these nitrogenase protein.<sup>[1-4]</sup>

**Enzymatic Assays.** Each  $\text{H}_2\text{O}$ -based reaction of  $\text{CO}_2$  reduction had, in a 37.5 mL reaction vial, a total volume of 25 mL, which contained 100 mM Tris (pH 8.0), 20.4 mM MgATP, 43.2 mM  $\text{MgCl}_2$ , 245 mM creatine phosphate, 420 U/mL creatine phosphokinase, 20 mM sodium dithionite and 1 M  $\text{NaHCO}_3$  as a  $\text{CO}_2$  source. This reaction mixture was allowed to equilibrate for 1 h, followed by the adjustment of pH to 8.5. The reaction was started by the addition of 150 mg VnfH plus 100 mg MoFe protein, or 150 mg NifH plus 100 mg VFe protein. Subsequently, the reaction was shaken in a water bath at  $30^\circ\text{C}$  and samples were taken at 0, 30, 60, 120 and 180 min, respectively.  $\text{NaHCO}_3$  was omitted from the assays addressing whether the hydrocarbons generated by  $\text{CO}_2$  reduction came indirectly from CO reduction. In these assays, CO were added in the headspaces of the vials and equilibrated at 110 ppm, which represented the maximum amount of CO produced from  $\text{CO}_2$  reduction. The  $\text{D}_2\text{O}$ -based assay had the same composition as the  $\text{H}_2\text{O}$ -based assay except that all components were dissolved in 100 mM (D11)-Tris [*i.e.*, (DOCD2)3CND2] buffer. In addition, all protein samples used in these assays were exchanged into the same deuterated buffer. The pD of this buffer was adjusted to 8.0 with DCl and NaOD by using the pH indicator strips and subsequently determining the pD by a previously established equation:<sup>[5]</sup> pD = measured pH + 0.40. For GC-MS analysis (*see below*), the  $\text{H}_2\text{O}$ - or  $\text{D}_2\text{O}$ -based assays of  $\text{CO}_2$  reduction were prepared as described above except for the substitution of  $\text{NaH}^{13}\text{CO}_3$  for  $\text{NaH}^{12}\text{CO}_3$ .

**Activity Determination.** The products  $\text{CH}_4$ ,  $\text{C}_2\text{H}_4$  and  $\text{C}_2\text{H}_6$  were quantified by GC-FID using a previously published method.<sup>[6-8]</sup> For each assay, a total of 250  $\mu\text{L}$  headspace was injected onto a Grace activated alumina column (Columbia, MD), which was held at  $55^\circ\text{C}$  for 1 min, heated to  $180^\circ\text{C}$  at  $12.5^\circ\text{C}/\text{min}$ , and held at  $180^\circ\text{C}$  for another 2.6 min. The quantities of these products were determined based on a Scott standard gas mixture (Houston, TX) containing 15 ppm of each hydrocarbon compound. The product CO was quantified by GC coupled to an SRI reduction gas detector (Torrance, CA). For each assay, a total of 250  $\mu\text{L}$  headspace was applied onto a Grace molecular sieve column, which was held at a constant temperature of  $50^\circ\text{C}$ . The quantity of CO was determined based on a linear standard curve ( $R^2 \geq 98$ ) derived from the injection of varying amounts of  $^{12}\text{CO}$  (99.5% purity). The detection limits for the products were, in nmol product/ $\mu\text{mol}$  protein, 0.38 ( $\text{CH}_4$ ), 0.23 ( $\text{C}_2\text{H}_4$ ), 0.36 ( $\text{C}_2\text{H}_6$ ) and 0.1 (CO).

**GC-MS Analysis.** The hydrocarbon products were identified by GC-MS using an Agilent 6890 GC system (Santa Clara, CA) coupled to a Waters GCT-Premier time-of-flight mass spectrometer (Milford, MA). The identities of CH<sub>4</sub>, CD<sub>4</sub>, C<sub>2</sub>D<sub>4</sub> and C<sub>2</sub>D<sub>6</sub> were confirmed by comparing their masses and retention times with those of the Scott standard alkane and alkene gas mixture. For each assay, a total of 50 µL headspace was injected into a split/splitless injector operated at 125°C in split mode, with a split ratio of 5. A 1 mm ID liner was used to optimize sensitivity. Separation of gas was achieved with an Agilent 0.320 mm (ID) x 30 m (length) HP-PLOT-Q capillary column, which was held at 40°C for 1 min, heated to 45°C at a rate of 5°C/min, heated further to 200°C at a rate of 20°C/min, and held at 200°C for another 4 min. The carrier gas, helium, was passed through the column at a rate of 1.1 mL/min. The mass spectrometer was operated in electron impact (EI) ionization mode.

- [1] M. W. Ribbe, Y. Hu, M. Guo, B. Schmid, B. K. Burgess, *J. Biol. Chem.* **2002**, *277*, 23469-23476.
- [2] Y. Hu, A. W. Fay, P. C. Dos Santos, F. Naderi, M. W. Ribbe, *J. Biol. Chem.* **2004**, *279*, 54963-54971.
- [3] B. K. Burgess, D. B. Jacobs, E. I. Stiefel, *Biochim Biophys Acta* **1980**, *614*, 196-209.
- [4] Y. Hu, A. W. Fay, M. W. Ribbe, *Proc. Natl. Acad. Sci. USA* **2005**, *102*, 3236-3241.
- [5] P. K. Glasoe, F. A. Long, *J. Phys. Chem.* **1960**, *64*, 188-189.
- [6] C. C. Lee, Y. Hu, M. W. Ribbe, *Proc. Natl. Acad. Sci. USA* **2009**, *106*, 9209-9214.
- [7] C. C. Lee, Y. Hu, M. W. Ribbe, *Science* **2010**, *329*, 642.
- [8] Y. Hu, C. C. Lee, M. W. Ribbe, *Science* **2011**, *333*, 753-755.
